# Supplementary material for: Estrogen regulates luminal progenitor cell differentiation through H19 gene expression
Source: PubMed Central journal article supplement (PMC4498491; doi:10.1530/erc-15-0105), 2015-08

**A**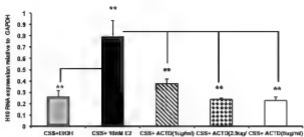**B**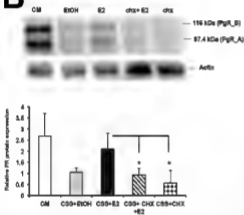**C**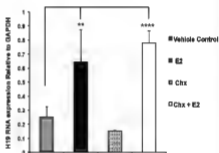**D**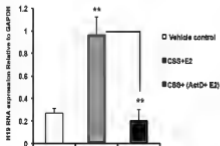**E**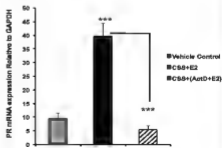

Supplement: supp_ERC-15-0105_Supplementary_figure_7.pdf [file supp_ERC-15-0105_Supplementary_figure_7.pdf]
