# Supplementary material for: Estrogen regulates luminal progenitor cell differentiation through H19 gene expression
Source: PubMed Central journal article supplement (PMC4498491; doi:10.1530/erc-15-0105), 2015-08
Supplement: supp_ERC-15-0105_Supplementary_information_1.pdf [file supp_ERC-15-0105_Supplementary_information_1.pdf]

## 1 SUPPLEMENTARY MATERIALS AND METHODS

2

### 3 **Isolation of progenitors from the reduction mammoplasty samples**

4 In our hands, the unseparated non-cultured reduction mammoplasty samples contain 22% lineage  
5 positive cells (CD35+CD45+). To enhance the frequency of progenitors, single-cell suspensions  
6 prepared from the reduction mammoplasty samples are placed in an overnight culture with 5%  
7 fetal calf serum supplemented SF7 growth media. We find that after this overnight culture the  
8 percentage of lineage positive cells falls to <1.6% of the total cells. Therefore when using pre-  
9 cultured cells to isolate luminal and the bipotent progenitors, we do not include antibodies to  
10 exclude lineage positive cells from the pre-cultured cells.

11 It should also be noted that the organoid-enriched fractions while enriched for breast epithelial  
12 cells, still contain some stromal fibroblasts that could stain positively for CD49f. We have  
13 therefore examined the expression of CD49f on fibroblasts and found that at the antibody dilution  
14 that we use (clone ID G0H3, 1:100) no significant staining for CD49f can be detected on  
15 fibroblasts.

16

### 17 **Breast cancer cell cultures**

18 The ER positive breast cancer cell lines MCF-7 and T-47D cells were obtained from the  
19 American Type Tissue Culture (www.ATCC.org). The MCF7 cells were maintained in  
20 Dulbecco's Modified Eagle Medium (DMEM) supplemented with 5% fetal bovine serum (FBS)  
21 and the T-47D cells were maintained in Roswell Park Memorial Institute (RPMI)-1640 media  
22 (Sigma) supplemented with bovine Insulin (Sigma) and 10% FBS. The ER negative MDA-  
23 MB231-ER $\beta$  cells were generated and maintained as previously described [unpublished data and  
24 Murphy et al. 2005].

25

## 26 **Estrogen signaling in breast cancer cells**

27 MCF7 cells were cultured in in PRF-DMEM media supplemented with 5% charcoal-stripped  
28 serum (v/v) 2× charcoal/dextran-treated FBS (estrogen-depleted growth media). After 48 hours,  
29 cells were treated with E2 (10 nM) or ICI (at the indicated doses) or ICI plus E2 or Actinomycin  
30 D (ActD) or cycloheximide (chx, 50 µg/ml both from Sigma Aldrich) or 4,4',4''-(4-propyl-[1H]-  
31 pyrazole-1,3,5-triyl) trisphenol (PPT) or 2,3-bis(4-hydroxyphenyl)-propionitrile (DPN, both from  
32 Tocris Bioscience) or EtOH. After 24 hrs RNA or protein was extracted.

33

## 34 **Immunofluorescent staining**

35 Luminal or the bipotent progenitors were directly placed on glass slides and fixed in Acetone:  
36 Methanol (1:1) as described (Raouf et al. 2008), and stained with IgG or anti *ERα* antibody and  
37 detected by a FITC conjugated secondary antibody. PI staining was used to visualize the  
38 nucleolus. Colonies from the CFC assays were fixed with Acetone: Methanol and blocked with  
39 Dual Endogenous Enzyme Block (Dako) and were stained with antibody raised against a luminal  
40 cell marker Cytokeratin 18 (Abcam, at 1:400 dilution), and Cytokeratin 14 (Abcam, at 1:400  
41 dilution), a myoepithelial cell marker. The expression of each protein was detected using a FITC  
42 or Cy3 conjugated secondary antibody (at 1:500 dilution). DAPI staining was used to distinguish  
43 the nucleolus. The glass slides or the plates were observed using a fluorescent microscope.

44 Luminal progenitors were isolated as described before and were placed in Matrigel cultures for 7  
45 days. The cultures were then switched to estrogen-reduced growth media for 48 hrs, after which  
46 the matrigel cultures were supplemented with estradiol (E2) or ethanol (EtOH). After 24 hrs, the  
47 gels were extracted and formalin fixed and embedded in paraffin. Sections were prepared from  
48 the paraffin then blocked, deparafinized and stained with antibodies against *ERα*. FITC  
49 conjugated secondary antibody was used to detect the expression of *ERα*. DAPI was used to mark  
50 the nucleolus. For some experiments, sorted luminal progenitors from human breast reduction

51 samples were placed in matrigel cultures in complete medium for 7 days. After 7 days the gels  
52 were dissolved and cells were made into single cells. The cells were then fixed and permeabilized  
53 using BD Perm and Fix Kit (using manufacture's protocol). Thereafter, the cells were stained  
54 with anti *ERα* antibody (6F11, Abcam) and analyzed using a fluorescent Microscope. DAPI was  
55 used to stain the nucleoli.

56

### 57 **RT-PCR and quantitative PCR**

58 RNA from each sample was made into cDNA (Thermoscientific) and was used as template in  
59 Real-time Polymerase Chain Reaction (RT-PCR). For this purpose, human-specific primers were  
60 used (sequences available upon request) to detect the expression levels of *ERα*, *ERβ*, *PR*, *pS2*,  
61 *HI9*, and the *GAPDH* genes in triplicates. All primers were designed to target exon-exon  
62 junctions. The relative transcript expression levels were calculated using the standard  $\Delta$ CT  
63 method where normalized to the *GAPDH* expression.

64

### 65 **Intracellular Flowcytometry**

66 Sorted luminal progenitors from human breast reduction samples were placed in matrigel cultures  
67 in complete medium for 7 days. After 7 days the gels were dissolved and cells were made into  
68 single cells. The cells were then fixed and permeabilized using BD Perm and Fix Kit (BD  
69 Biosciences, using the manufacture's protocol). Thereafter, cells were stained with anti *ERα*  
70 antibody (6F11, Abcam) and analyzed using a bench top Flowcytometer. For some experiments,  
71 gels were treated with E2 or EtOH for an additional 7 days, when gels were dissolved single cells  
72 were obtained, fixed and permeabilized. Cells were stained with antibodies against Ki67 (Abcam),  
73 CD49f-Alexa647, EpCAM or Cytokeratin 14 (Abcam, detected with PE conjugated secondary  
74 antibody) or Cytokeratin 8/18 (Abcam, detected Alexa-647 conjugated secondary antibody) and

75 their expression was examined using a bench top Flowcytometer. The data was analyzed using  
76 the FlowJo software.

77  
78 **Western Blot Analysis**  
79 Protein lysates were prepared as described (Chatterjee et al. 2014) and 50 µg of protein was ran  
80 on a 10% SDS-PAGE gel and transferred to a membrane. Each membrane was blocked and  
81 probed with antibodies against Progesterone Receptor (*PR*) (Vector Lab, at 1:1,000) or *β-Actin*  
82 (Sigma, 1:10,000). The protein bands were detected using a Horseradish peroxidase (HRP)-  
83 conjugated secondary antibody (at 1:10,000) and visualized using HRP substrate. The protein  
84 expression was determined using *β-Actin* expression as loading control. The signal intensities  
85 were determined using the Fusion-CAPT software (Vilber Lourmat).

86

## 87 **SUPPLEMENTARY REFERENCES**

88  
89 Chatterjee S, Bacopulos S, Yang W et al. 2014 Loss of *igfbp7* causes precocious involution in  
90 lactating mouse mammary gland. *PLoS One*. **9** e87858.  
91 Murphy LC, Peng B, Lewis A et al. 2005 Inducible upregulation of oestrogen receptor-beta1  
92 affects oestrogen and tamoxifen responsiveness in MCF7 human breast cancer cells. *J Mol*  
93 *Endocrinol* **34** 553-566.  
94 Raouf A, Zhao Y, To K et al. 2008 Transcriptome analysis of the normal human mammary cell  
95 commitment and differentiation process. *Cell Stem Cell* **3** 109-118.

96

97

98
