# Supplementary material for: Estrogen regulates luminal progenitor cell differentiation through H19 gene expression
Source: PubMed Central journal article supplement (PMC4498491; doi:10.1530/erc-15-0105), 2015-08
Supplement: supp_ERC-15-0105_Supplementary_table_1.pdf [file supp_ERC-15-0105_Supplementary_table_1.pdf]

**SUPPLEMENTARY TABLE 1****Supplementary Table 1. Sequence of primers utilized**

| Amplified Region                        | FORWARD (5'-3')       | REVERSE (5'- 3')       |
|-----------------------------------------|-----------------------|------------------------|
| +2 to +76                               | CGGGGGTCATCTGGGAATAG  | GCATTATCCACAGCCCCGT    |
| +32 to +136                             | GAGCCGCACCAGATCTTCAG  | CTGGGACTCAAGTCACGCCTAC |
| +773 to + 902                           | CAGCGATGGCACAGAATCGG  | TAGCAAAATGTGGGGGTCTGC  |
| +981 to +1074                           | G TTCACGCACGACAAAGC   | GAACAGAGGGTTTGCCGAAGG  |
| +1172 to +1289                          | CTCGAGACTTGAGGTGAACCC | GGAGTCGAAACTCGCCAGTCT  |
| +1412 to +1522*                         | ACAGGAAAGTGGCCGCGA    | CAACTGGATGGGAATCGGC    |
| ER non responsive region                | GCCACCAGCCTGCTTTCTGT  | CGTGGATGGGTCCGAGAAC    |
| *Primers amplifying both ERE half sites |                       |                        |

**Sequence of primers utilized.** The table shows the primer sequences used in the ChIP experiment. The primer sequences are amplifying the half ERE sites located upstream of Transcription Start site (TSS).
